# Supplementary material
Source: HighWire-hosted journal article supplement (doi:10.1101/rna.080035.124)
Supplement: Supplemental_Table_S1.xlsx [file Supplemental_Table_S1.xlsx]

## Sheet: Sheet1
Conformations	Essential Residues Stablizing Conformation
3_6	G10U, U11A, G25A, C26A, C75A, A76C
3_3	U11A, G78A, G80U
3_5	G80C, U81C
