# Supplementary material
Source: HighWire-hosted journal article supplement (doi:10.1101/rna.080035.124)
Supplement: Supplemental_Table_S2.xlsx [file Supplemental_Table_S2.xlsx]

## Sheet: Sheet1
	SARS-CoV-2 FSE	Read Depths
	Wild Type 77nt	1.2 Million
	Wild Type 87nt	0.8 Million
	Wild Type 156nt	3.5 Million
	Wild Type 222nt	2 Million
	Mutant 3_6	0.7 million
	Mutant 3_5	0.7 million
	Mutant 3_3	0.9 Million
